# Supplementary material for: Production of chirp trains by Indo-Pacific humpback dolphins (Sousa chinensis) in the northern South China Sea
Source: Research Square preprint supplement (doi:10.21203/rs.3.rs-6832903/v1), 2025-06-18
Supplement: Supplementary file 1 [file 9483bad2bcaa44d9ca2ce00c.pdf]

Production of chirp trains by Indo-Pacific humpback dolphins (*Sousa chinensis*) in the northern South China Sea

Journal Name: Behavioral Ecology and Sociobiology

Hongri Wang, Agathe Serres, Yixi Shi, Lijun Dong, Songhai Li

\* Corresponding author: E-mail address: [lish@idsse.ac.cn](mailto:lish@idsse.ac.cn) (S. Li). [agathe@idsse.ac.cn](mailto:agathe@idsse.ac.cn) (A. Serres).

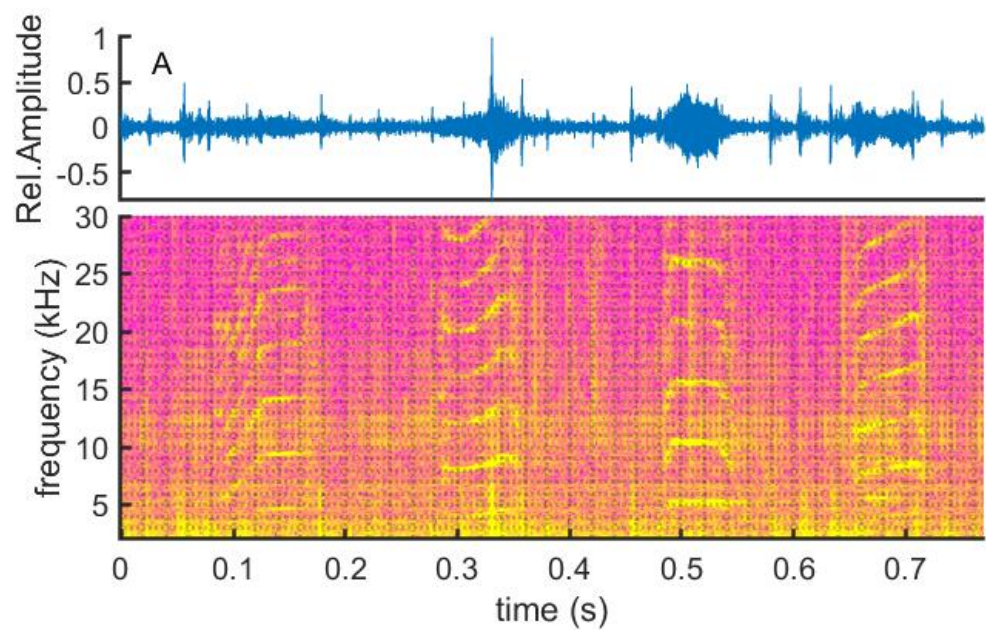

Figure S1: Example of a chirp train including two upsweep chirps followed by one convex chirp and one upsweep chirp (fast Fourier transform (FFT) size of 2048, Hann window with 75% overlap, frequency range of 0 – 30 kHz)

Table S1: Post hoc results for location of the selected generalized linear model with chirp train occurrence as the response variable.

| location | Chi-square | Df | <i>p</i> |
|----------|------------|----|----------|
|----------|------------|----|----------|

|         |        |   |          |
|---------|--------|---|----------|
| PRD -ZJ | 6.1857 | 1 | 0.01287* |
| PRD-SNB | 0.9262 | 1 | 0.3358   |
| ZJ-SNB  | 0.9213 | 1 | 0.3371   |

\*\*\*:  $p < 0.001$ ; \*\*:  $p < 0.01$ ; \*:  $p < 0.05$ ; ∴  $p < 0.1$

Table S2: Post hoc results for location of the selected generalized linear model with number of chirp trains as the response variable.

| location | Chi-square | Df | $p$     |
|----------|------------|----|---------|
| PRD -ZJ  | 4.1054     | 1  | 0.0451* |
| PRD-SNB  | 1.8609     | 1  | 0.1725  |
| ZJ-SNB   | 0.7371     | 1  | 0.3906  |

\*\*\*:  $p < 0.001$ ; \*\*:  $p < 0.01$ ; \*:  $p < 0.05$ ; ∴  $p < 0.1$

Table S3: Post hoc results for habitat of the selected generalized linear model with chirp train occurrence as the response variable.

| habitat | Chi-square | Df | $p$      |
|---------|------------|----|----------|
| BC-NS   | 1.8681     | 1  | 0.1717   |
| BC-OW   | 6.7222     | 1  | 0.0095** |
| OW-NS   | 0.2996     | 1  | 0.5841   |

\*\*\*:  $p < 0.001$ ; \*\*:  $p < 0.01$ ; \*:  $p < 0.05$ ; ∴  $p < 0.1$

Table S4: Post hoc results for habitat of the selected generalized linear model with number of chirp trains as the response variable.

| habitat | Chi-square | Df | $p$     |
|---------|------------|----|---------|
| BC-NS   | 2.1393     | 1  | 0.1436  |
| BC-OW   | 4.0888     | 1  | 0.0432* |
| OW-NS   | 1.7240     | 1  | 0.1892  |

\*\*\*:  $p < 0.001$ ; \*\*:  $p < 0.01$ ; \*:  $p < 0.05$ ; ∴  $p < 0.1$

Table S5: Post hoc results for behavior of the selected generalized linear model with chirp train occurrence as the response variable.

| behavior | Chi-square | Df | $p$       |
|----------|------------|----|-----------|
| F-M      | 1.3484     | 1  | 0.2456    |
| F-R      | 1.1602     | 1  | 0.2814    |
| F-S      | 4.9569     | 1  | 0.0260*   |
| F-T      | 0.2180     | 1  | 0.6405    |
| M-R      | 0.0550     | 1  | 0.8146    |
| M-S      | 12.2749    | 1  | 0.0004*** |
| M-T      | 0.25101    | 1  | 0.6164    |
| R-S      | 0.0000     | 1  | 1.0000    |
| R-T      | 0.92629    | 1  | 0.3358    |

|     |        |   |          |
|-----|--------|---|----------|
| S-T | 7.0607 | 1 | 0.0079** |
|-----|--------|---|----------|

\*\*\*:  $p < 0.001$ ; \*\*:  $p < 0.01$ ; \*:  $p < 0.05$ ; ∴  $p < 0.1$

Table S6: Post hoc results for behavior of the selected generalized linear model with number of chirp trains as the response variable.

| .behavior | Chi-square | Df | $p$         |
|-----------|------------|----|-------------|
| F-M       | 0.0335     | 1  | 0.8549      |
| F-R       | 0.9876     | 1  | 0.3203      |
| F-S       | 12.5832    | 1  | 0.0004***   |
| F-T       | 0.6240     | 1  | 0.4295      |
| M-R       | 1.9400     | 1  | 0.1637      |
| M-S       | 4.8192     | 1  | 0.0281*     |
| M-T       | 0.2436     | 1  | 0.6216      |
| R-S       | 0.0000     | 1  | 1.0000      |
| R-T       | 0.3966     | 1  | 0.5289      |
| S-T       | 19.7560    | 1  | 0.000009*** |

\*\*\*:  $p < 0.001$ ; \*\*:  $p < 0.01$ ; \*:  $p < 0.05$ ; ∴  $p < 0.1$

Table S7: Statistical outcomes of the selected generalized linear model with chirp train occurrence as the response variable.

| LR         | Chi-square | Df | $p$       |
|------------|------------|----|-----------|
| Location   | 6.4414     | 2  | 0.0399*   |
| Group size | 14.2324    | 1  | 0.0002*** |
| Young      | 2.9518     | 1  | 0.0858    |
| Behavior   | 8.5302     | 4  | 0.0740    |
| Habitat    | 8.7981     | 2  | 0.0123*   |

\*\*\*:  $p < 0.001$ ; \*\*:  $p < 0.01$ ; \*:  $p < 0.05$ ; ∴  $p < 0.1$

Table S8: Statistical outcomes of the selected generalized linear model with number of chirp trains as the response variable.

| LR           | Chi-square | Df | $p$       |
|--------------|------------|----|-----------|
| Location     | 5.6433     | 2  | 0.0595    |
| Group size   | 0.3901     | 1  | 0.5323    |
| Young        | 0.4627     | 1  | 0.4964    |
| Behavior     | 18.8144    | 4  | 0.0008*** |
| Habitat      | 5.6828     | 2  | 0.0583    |
| Vessel count | 2.6634     | 1  | 0.1027    |

\*\*\*:  $p < 0.001$ ; \*\*:  $p < 0.01$ ; \*:  $p < 0.05$ ; ∴  $p < 0.1$
